# Supplementary material for: Gender inequity in speaking opportunities at the American Geophysical Union Fall Meeting
Source: PubMed Central journal article supplement (PMC5915405; doi:10.1038/s41467-018-03809-5), 2018-04-24
Supplement: 41467_2018_3809_MOESM1_ESM.pdf [file 41467_2018_3809_MOESM1_ESM.pdf]

## **Supplementary Materials**

Gender inequity in speaking opportunities at the American Geophysical Union Fall Meeting

Ford et al.,

Supplementary Figure 1. The proportion of women in the Sections and invited authors, author assigned oral presentations and authors opting for “poster only” presentations.

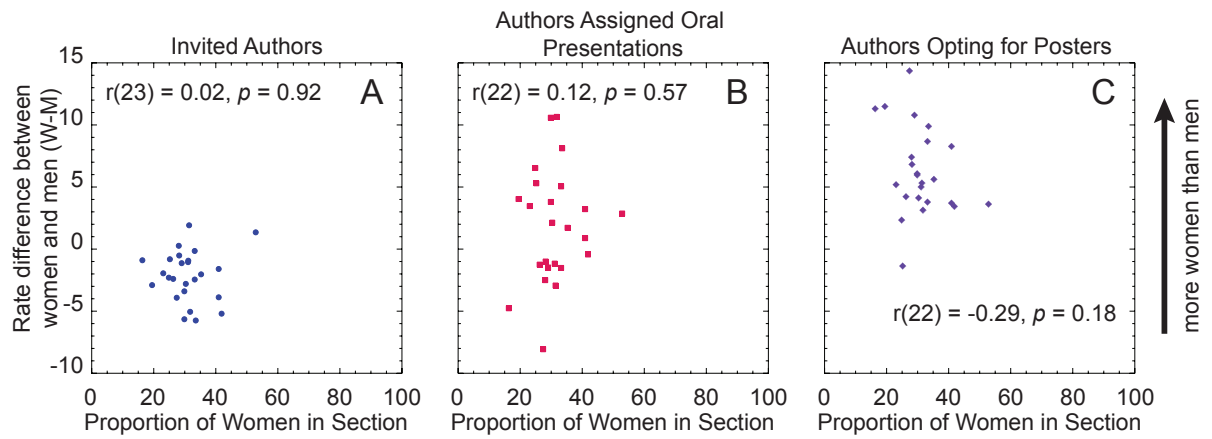

For all Supplementary Tables, significant results ( $p < 0.05$ ) are in **bold**.

Supplementary Table 1. Analysis of Invited Authors by First Author Career Stage

|                          | <i>Total</i>     |       | <i>Student</i> |       | <i>Early Career</i> |       | <i>Mid-Career</i> |       | <i>Experienced</i> |       | <i>Retired</i> |       |
|--------------------------|------------------|-------|----------------|-------|---------------------|-------|-------------------|-------|--------------------|-------|----------------|-------|
| <i>Total Abstracts</i>   | 65,247           |       | 18789          |       | 23112               |       | 14815             |       | 7307               |       | 186            |       |
|                          | F                | M     | F              | M     | F                   | M     | F                 | M     | F                  | M     | F              | M     |
|                          | 20900            | 44347 | 8042           | 10747 | 7900                | 15212 | 3548              | 11267 | 1157               | 6150  | 18             | 168   |
|                          | 32%              | 68%   | 43%            | 57%   | 34%                 | 66%   | 24%               | 76%   | 16%                | 84%   | 10%            | 90%   |
| <i>Invited Authors</i>   | 2040             | 5499  | 124            | 192   | 862                 | 1501  | 725               | 2134  | 281                | 1477  | 2              | 22    |
| <i>Invited Authors %</i> | 9.8%             | 12.4% | 1.5%           | 1.8%  | 10.9%               | 9.9%  | 20.4%             | 18.9% | 24.3%              | 24.0% | 11.1%          | 13.1% |
| <i>mean</i>              | 1.10             | 1.12  | 1.02           | 1.02  | 1.11                | 1.10  | 1.20              | 1.19  | 1.24               | 1.24  | 1.11           | 1.13  |
| <i>std</i>               | 0.297            | 0.330 | 0.123          | 0.132 | 0.312               | 0.298 | 0.403             | 0.392 | 0.429              | 0.427 | 0.323          | 0.338 |
| $\chi^2$                 | <b>96.8</b>      |       | 1.66           |       | <b>6.18</b>         |       | <b>3.87</b>       |       | 0.0391             |       | 0.0570         |       |
| <i>p-value</i>           | <b>&lt;0.001</b> |       | 0.197          |       | <b>0.013</b>        |       | <b>0.049</b>      |       | 0.843              |       | 0.811          |       |

Supplementary Table 2. Analysis of Oral Presentations by First Author Career Stage

|                        | <i>Total</i>     |       | <i>Student</i> |       | <i>Early Career</i> |       | <i>Mid-Career</i> |       | <i>Experienced</i> |       | <i>Retired</i> |       |
|------------------------|------------------|-------|----------------|-------|---------------------|-------|-------------------|-------|--------------------|-------|----------------|-------|
| <i>Total Abstracts</i> | 31348            |       | 7275           |       | 11293               |       | 7913              |       | 4138               |       | 85             |       |
|                        | F                | M     | F              | M     | F                   | M     | F                 | M     | F                  | M     | F              | M     |
|                        | 9424             | 21924 | 3017           | 4258  | 3880                | 7413  | 1808              | 6105  | 584                | 3554  | 10             | 75    |
|                        | 30%              | 70%   | 41%            | 59%   | 34%                 | 66%   | 23%               | 77%   | 14%                | 86%   | 12%            | 88%   |
| <i>Assigned Oral</i>   | 3874             | 9759  | 869            | 1173  | 1633                | 3080  | 960               | 3138  | 340                | 2064  | 3              | 38    |
| <i>Assigned Oral %</i> | 41.1%            | 44.5% | 28.8%          | 27.5% | 42.1%               | 41.5% | 53.1%             | 51.4% | 58.2%              | 58.1% | 30.0%          | 50.7% |
| <i>mean</i>            | 1.59             | 1.55  | 1.71           | 1.72  | 1.58                | 1.58  | 1.47              | 1.49  | 1.42               | 1.42  | 1.70           | 1.49  |
| <i>std</i>             | 0.492            | 0.485 | 0.453          | 0.447 | 0.494               | 0.493 | 0.499             | 0.500 | 0.494              | 0.494 | 0.483          | 0.503 |
| $\chi^2$               | <b>31.1</b>      |       | 1.38           |       | 0.304               |       | 1.61              |       | 0.00430            |       | 1.51           |       |
| <i>p-value</i>         | <b>&lt;0.001</b> |       | 0.24           |       | 0.581               |       | 0.205             |       | 0.948              |       | 0.219          |       |

Supplementary Table 3. Analysis of Invited Authors, Authors Assigned Oral Presentation and Authors Opting for “Poster Only” Presentations by Sections. Due to the relatively small numbers within each Section, the absolute numbers are not provided in order to maintain anonymity.

| <i>Rate Difference Between Women and Men (Women - Men)</i> |                            |                        |                                   |                                                       |
|------------------------------------------------------------|----------------------------|------------------------|-----------------------------------|-------------------------------------------------------|
| <i>Sections</i>                                            | <i>Proportion of Women</i> | <i>Invited Authors</i> | <i>Assigned Oral Presentation</i> | <i>Authors Opting for “Poster Only” Presentations</i> |
| <i>Atmospheric and Space Electricity</i>                   | 16%                        | -0.9%                  | -4.8%                             | 11.3%                                                 |
| <i>Atmospheric Sciences</i>                                | 32%                        | -5.1%                  | 10.6%                             | 3.1%                                                  |
| <i>Biogeosciences</i>                                      | 41%                        | -3.9%                  | 3.2%                              | 3.7%                                                  |
| <i>Cryosphere</i>                                          | 31%                        | -0.9%                  | -1.2%                             | 5.0%                                                  |
| <i>Earth and Planetary Surface Processes</i>               | 33%                        | -0.1%                  | -1.5%                             | 3.8%                                                  |
| <i>Earth and Space Science Informatics</i>                 | 26%                        | -2.4%                  | -1.3%                             | 4.2%                                                  |
| <i>Education</i>                                           | 53%                        | 1.3%                   | 2.9%                              | 3.6%                                                  |
| <i>Geodesy</i>                                             | 25%                        | -2.3%                  | 6.5%                              | 2.3%                                                  |
| <i>Geomagnetism, Paleomagnetism and Electromagnetism</i>   | 27%                        | -3.9%                  | -8.1%                             | 14.4%                                                 |
| <i>Global Environmental Change</i>                         | 34%                        | -5.8%                  | 8.1%                              | 9.9%                                                  |
| <i>Hydrology</i>                                           | 30%                        | -3.4%                  | 3.8%                              | 6.1%                                                  |
| <i>Mineral and Rock Physics</i>                            | 29%                        | -1.1%                  | -1.5%                             | 10.8%                                                 |
| <i>Natural Hazards</i>                                     | 30%                        | -5.7%                  | 10.6%                             | 6.0%                                                  |
| <i>Near Surface Geophysics</i>                             | 25%                        | -0.8%                  | 5.3%                              | -1.4%                                                 |
| <i>Nonlinear Geophysics</i>                                | 19%                        | -2.9%                  | 4.0%                              | 11.5%                                                 |
| <i>Ocean Sciences</i>                                      | 33%                        | -2.4%                  | 5.1%                              | 8.7%                                                  |
| <i>Paleoceanography and Paleoclimatology</i>               | 41%                        | -1.6%                  | 0.9%                              | 8.3%                                                  |
| <i>Planetary Sciences</i>                                  | 28%                        | 0.3%                   | -2.5%                             | 7.4%                                                  |
| <i>Public Affairs</i>                                      | 42%                        | -5.2%                  | -0.4%                             | 3.4%                                                  |
| <i>Seismology</i>                                          | 28%                        | -0.5%                  | -1.0%                             | 6.8%                                                  |
| <i>Space Physics &amp; Aeronomy</i>                        | 23%                        | -2.0%                  | 3.5%                              | 5.2%                                                  |
| <i>Study of Earth's Deep Interior</i>                      | 31%                        | 1.9%                   | -2.9%                             | 5.3%                                                  |
| <i>Tectonophysics</i>                                      | 30%                        | -2.8%                  | 2.1%                              | 4.1%                                                  |
| <i>Union</i>                                               | 31%                        | -1.0%                  | -                                 | -                                                     |
| <i>Volcanology, Geochemistry and Petrology</i>             | 35%                        | -2.0%                  | 1.7%                              | 5.6%                                                  |
|                                                            | <i>r</i>                   | 0.02                   | 0.12                              | -0.29                                                 |
|                                                            | <i>df</i>                  | 23                     | 22                                | 22                                                    |
|                                                            | <i>p-value</i>             | 0.92                   | 0.57                              | 0.18                                                  |

Supplementary Table 4. Analysis of Primary Convener Allocation of Invited Authors by First Author Career Stage

|                                | <i>Total</i>     |      | <i>FA Student</i> |     | <i>FA Early Career</i> |      | <i>FA Mid-Career</i> |      | <i>FA Experienced</i> |      | <i>FA Retired</i> |      |
|--------------------------------|------------------|------|-------------------|-----|------------------------|------|----------------------|------|-----------------------|------|-------------------|------|
| <i>Total Abstracts</i>         | 7442             |      | 314               |     | 2336                   |      | 2818                 |      | 1733                  |      | 24                |      |
| <i>Female Primary Convener</i> | 2081             | 28%  | 87                | 28% | 695                    | 30%  | 790                  | 28%  | 447                   | 26%  | 9                 | 38%  |
|                                | F                | M    | F                 | M   | F                      | M    | F                    | M    | F                     | M    | F                 | M    |
| <i>Invited Authors</i>         | 716              | 1365 | 38                | 49  | 309                    | 386  | 258                  | 532  | 93                    | 354  | 2                 | 7    |
| <i>Invited Authors %</i>       | 34%              | 66%  | 44%               | 56% | 44%                    | 56%  | 33%                  | 67%  | 21%                   | 79%  | 22%               | 78%  |
| <i>mean</i>                    | 0.656            |      | 0.563             |     | 0.555                  |      | 0.673                |      | 0.792                 |      | 0.778             |      |
| <i>std</i>                     | 0.475            |      | 0.499             |     | 0.497                  |      | 0.469                |      | 0.406                 |      | 0.441             |      |
| <i>Male Primary Convener</i>   | 5361             | 72%  | 227               | 72% | 1641                   | 70%  | 2028                 | 72%  | 1286                  | 74%  | 15                | 63%  |
|                                | F                | M    | F                 | M   | F                      | M    | F                    | M    | F                     | M    | F                 | M    |
| <i>Invited Authors</i>         | 1302             | 4059 | 86                | 141 | 542                    | 1099 | 458                  | 1570 | 186                   | 1100 | 0                 | 15   |
| <i>Invited Authors %</i>       | 24%              | 76%  | 38%               | 62% | 33%                    | 67%  | 23%                  | 77%  | 14%                   | 86%  | 0%                | 100% |
| <i>mean</i>                    | 0.757            |      | 0.621             |     | 0.670                  |      | 0.774                |      | 0.855                 |      | 1.00              |      |
| <i>std</i>                     | 0.429            |      | 0.486             |     | 0.470                  |      | 0.418                |      | 0.352                 |      | 0.000             |      |
| $\chi^2$                       | <b>77.7</b>      |      | 0.883             |     | <b>27.6</b>            |      | <b>30.4</b>          |      | <b>9.88</b>           |      | 3.64              |      |
| <i>p-value</i>                 | <b>&lt;0.001</b> |      | 0.347             |     | <b>&lt;0.001</b>       |      | <b>&lt;0.001</b>     |      | <b>0.002</b>          |      | 0.057             |      |

Supplementary Table 5. Analysis of Primary Convener Allocation of Oral Presentations by First Author Career Stage

|                                | <i>Total</i>     |      | <i>FA Student</i> |      | <i>FA Early Career</i> |      | <i>FA Mid-Career</i> |      | <i>FA Experienced</i> |      | <i>FA Retired</i> |     |
|--------------------------------|------------------|------|-------------------|------|------------------------|------|----------------------|------|-----------------------|------|-------------------|-----|
| <i>Total Abstracts</i>         | 17553            |      | 5187              |      | 6519                   |      | 3784                 |      | 1713                  |      | 44                |     |
| <i>Female Primary Convener</i> | 4665             | 27%  | 1357              | 26%  | 1749                   | 27%  | 1023                 | 27%  | 448                   | 26%  | 14                | 32% |
|                                | F                | M    | F                 | M    | F                      | M    | F                    | M    | F                     | M    | F                 | M   |
| <i>Assigned Authors</i>        | 1733             | 2932 | 610               | 747  | 708                    | 1041 | 307                  | 716  | 90                    | 358  | 2                 | 12  |
| <i>Assigned Authors %</i>      | 37%              | 63%  | 45%               | 55%  | 40%                    | 60%  | 30%                  | 70%  | 20%                   | 80%  | 14%               | 86% |
| <i>mean</i>                    | 0.629            |      | 0.550             |      | 0.595                  |      | 0.700                |      | 0.799                 |      | 0.857             |     |
| <i>std</i>                     | 0.483            |      | 0.498             |      | 0.491                  |      | 0.459                |      | 0.401                 |      | 0.363             |     |
| <i>Male Primary Convener</i>   | 12888            | 73%  | 3830              | 74%  | 4770                   | 73%  | 2761                 | 73%  | 1265                  | 74%  | 30                | 68% |
|                                | F                | M    | F                 | M    | F                      | M    | F                    | M    | F                     | M    | F                 | M   |
| <i>Assigned Authors</i>        | 3769             | 9119 | 1521              | 2309 | 1519                   | 3251 | 532                  | 2229 | 152                   | 1113 | 5                 | 25  |
| <i>Assigned Authors %</i>      | 29%              | 71%  | 40%               | 60%  | 32%                    | 68%  | 19%                  | 81%  | 12%                   | 88%  | 17%               | 83% |
| <i>mean</i>                    | 0.708            |      | 0.603             |      | 0.682                  |      | 0.807                |      | 0.880                 |      | 0.833             |     |
| <i>std</i>                     | 0.455            |      | 0.489             |      | 0.466                  |      | 0.394                |      | 0.325                 |      | 0.379             |     |
| $\chi^2$                       | <b>99.5</b>      |      | <b>11.4</b>       |      | <b>42.4</b>            |      | <b>49.9</b>          |      | <b>17.8</b>           |      | 0.0404            |     |
| <i>p-value</i>                 | <b>&lt;0.001</b> |      | <b>0.001</b>      |      | <b>&lt;0.001</b>       |      | <b>&lt;0.001</b>     |      | <b>&lt;0.001</b>      |      | 0.841             |     |

Supplementary Table 6. Analysis of Primary Convener Allocation of Invited Authors by Primary Convener Career Stage

|                                | <i>PC Student</i> |     | <i>PC Early Career</i> |      | <i>PC Mid-Career</i> |      | <i>PC Experienced</i> |     | <i>PC Retired</i> |     |
|--------------------------------|-------------------|-----|------------------------|------|----------------------|------|-----------------------|-----|-------------------|-----|
| <i>Total Abstracts</i>         | 358               |     | 3068                   |      | 2580                 |      | 1217                  |     | 67                |     |
| <i>Female Primary Convener</i> | 164               | 46% | 1069                   | 35%  | 533                  | 21%  | 257                   | 21% | 27                | 40% |
|                                | F                 | M   | F                      | M    | F                    | M    | F                     | M   | F                 | M   |
| <i>Invited Authors</i>         | 61                | 103 | 358                    | 711  | 184                  | 349  | 91                    | 166 | 8                 | 19  |
| <i>Invited Authors %</i>       | 37%               | 63% | 33%                    | 67%  | 35%                  | 65%  | 35%                   | 65% | 30%               | 70% |
| <i>mean</i>                    | 0.628             |     | 0.665                  |      | 0.655                |      | 0.646                 |     | 0.704             |     |
| <i>std</i>                     | 0.485             |     | 0.472                  |      | 0.476                |      | 0.479                 |     | 0.465             |     |
| <i>Male Primary Convener</i>   | 194               | 54% | 1999                   | 65%  | 2047                 | 79%  | 960                   | 79% | 40                | 60% |
|                                | F                 | M   | F                      | M    | F                    | M    | F                     | M   | F                 | M   |
| <i>Invited Authors</i>         | 58                | 136 | 497                    | 1502 | 509                  | 1538 | 192                   | 768 | 13                | 27  |
| <i>Invited Authors %</i>       | 30%               | 70% | 25%                    | 75%  | 25%                  | 75%  | 20%                   | 80% | 33%               | 68% |
| <i>mean</i>                    | 0.701             |     | 0.751                  |      | 0.751                |      | 0.800                 |     | 0.675             |     |
| <i>std</i>                     | 0.459             |     | 0.432                  |      | 0.432                |      | 0.400                 |     | 0.474             |     |
| $\chi^2$                       | 2.13              |     | <b>25.8</b>            |      | <b>20.1</b>          |      | <b>27.0</b>           |     | 0.0617            |     |
| <i>p-value</i>                 | 0.144             |     | <b>&lt;0.001</b>       |      | <b>&lt;0.001</b>     |      | <b>&lt;0.001</b>      |     | 0.804             |     |



Supplementary Table 7. Analysis of Primary Convener Allocation of Oral Presentations by Primary Convener Career Stage

|                                | <i>PC Student</i> |     | <i>PC Early Career</i> |      | <i>PC Mid-Career</i> |      | <i>PC Experienced</i> |      | <i>PC Retired</i> |     |
|--------------------------------|-------------------|-----|------------------------|------|----------------------|------|-----------------------|------|-------------------|-----|
| <i>Total Abstracts</i>         | 785               |     | 7717                   |      | 5921                 |      | 2598                  |      | 118               |     |
| <i>Female Primary Convener</i> | 339               | 43% | 2471                   | 32%  | 1228                 | 21%  | 503                   | 19%  | 38                | 32% |
|                                | F                 | M   | F                      | M    | F                    | M    | F                     | M    | F                 | M   |
| <i>Assigned Authors</i>        | 142               | 197 | 904                    | 1567 | 447                  | 781  | 197                   | 306  | 12                | 26  |
| <i>Assigned Authors %</i>      | 42%               | 58% | 37%                    | 63%  | 36%                  | 64%  | 39%                   | 61%  | 32%               | 68% |
| <i>mean</i>                    | 0.581             |     | 0.634                  |      | 0.636                |      | 0.608                 |      | 0.684             |     |
| <i>std</i>                     | 0.494             |     | 0.482                  |      | 0.481                |      | 0.489                 |      | 0.471             |     |
| <i>Male Primary Convener</i>   | 446               | 57% | 5246                   | 68%  | 4693                 | 79%  | 2095                  | 81%  | 80                | 68% |
|                                | F                 | M   | F                      | M    | F                    | M    | F                     | M    | F                 | M   |
| <i>Assigned Authors</i>        | 122               | 324 | 1599                   | 3647 | 1359                 | 3334 | 565                   | 1530 | 20                | 60  |
| <i>Assigned Authors %</i>      | 27%               | 73% | 30%                    | 70%  | 29%                  | 71%  | 27%                   | 73%  | 25%               | 75% |
| <i>mean</i>                    | 0.726             |     | 0.695                  |      | 0.710                |      | 0.730                 |      | 0.750             |     |
| <i>std</i>                     | 0.446             |     | 0.460                  |      | 0.454                |      | 0.444                 |      | 0.436             |     |
| $\chi^2$                       | <b>18.2</b>       |     | <b>28.6</b>            |      | <b>25.4</b>          |      | <b>29.1</b>           |      | 0.564             |     |
| <i>p-value</i>                 | <b>&lt;0.001</b>  |     | <b>&lt;0.001</b>       |      | <b>&lt;0.001</b>     |      | <b>&lt;0.001</b>      |      | 0.453             |     |

Supplementary Table 8. Analysis of Poster Only Selection by First Author by Career Stage

| <i>Total Abstracts</i> | <i>Total</i>     |       | <i>Student</i> |       | <i>Early Career</i> |       | <i>Mid-Career</i> |       | <i>Experienced</i> |       | <i>Retired</i> |       |
|------------------------|------------------|-------|----------------|-------|---------------------|-------|-------------------|-------|--------------------|-------|----------------|-------|
|                        | 43515            |       | 12660          |       | 15039               |       | 9982              |       | 4903               |       | 100            |       |
|                        | F                | M     | F              | M     | F                   | M     | F                 | M     | F                  | M     | F              | M     |
|                        | 13784            | 29731 | 5386           | 7274  | 5130                | 9909  | 2323              | 7659  | 735                | 4168  | 13             | 87    |
|                        | 32%              | 68%   | 43%            | 57%   | 34%                 | 66%   | 23%               | 77%   | 15%                | 85%   | 13%            | 87%   |
| <i>Poster Only</i>     | 4360             | 7807  | 2369           | 3016  | 1250                | 2496  | 515               | 1554  | 151                | 614   | 3              | 12    |
| <i>Poster Only %</i>   | 32%              | 26%   | 44%            | 41%   | 24%                 | 25%   | 22%               | 20%   | 21%                | 15%   | 23%            | 14%   |
| <i>mean</i>            | 1.32             | 1.26  | 1.44           | 1.41  | 1.24                | 1.25  | 1.22              | 1.20  | 1.21               | 1.15  | 1.23           | 1.14  |
| <i>std</i>             | 0.465            | 0.440 | 0.496          | 0.493 | 0.429               | 0.434 | 0.415             | 0.402 | 0.404              | 0.354 | 0.439          | 0.347 |
| $\chi^2$               | <b>135</b>       |       | <b>8.05</b>    |       | 1.22                |       | <b>3.83</b>       |       | <b>16.0</b>        |       | 0.765          |       |
| <i>p-value</i>         | <b>&lt;0.001</b> |       | <b>0.005</b>   |       | 0.269               |       | <b>0.050</b>      |       | <b>&lt;0.001</b>   |       | 0.382          |       |
